# Supplementary material
Source: PubMed Central journal article supplement (PMC3528019)
Supplement: NIHMS393624-supplement-01.pdf [file NIHMS393624-supplement-01.pdf]

**Table S1.** Leukocytes recruited by tumor derived CXCL1/2, Related to Figure 2.

| Surface markers                     | sh RNA control | sh Cxcl1/2 |
|-------------------------------------|----------------|------------|
| F4/80 <sup>+</sup>                  | 31.8           | 35.6       |
| CD4 <sup>+</sup>                    | 1.08           | 0.651      |
| CD8 <sup>+</sup>                    | 0.157          | 0.062      |
| CD3 <sup>+</sup> CD25 <sup>+</sup>  | 0.0536         | 0.0481     |
| CD3 <sup>+</sup> gdTCR <sup>+</sup> | 0.268          | 0.353      |
| CD3 <sup>-</sup> CD49 <sup>+</sup>  | 0.926          | 2.08       |
| B220 <sup>+</sup>                   | 4.88           | 7.09       |

**Table S2.** Immunophenotyping of tumor derived granulocytic-MDSC, Related to Figure 2.

| Surface markers | % positive cells |
|-----------------|------------------|
| CD80            | 5.8              |
| CD86            | 2.11             |
| F4/80           | 12.3             |
| CD117           | 2.94             |
| IL4R $\alpha$   | 1.22             |
| VEGFR1          | 0.175            |
| CD34            | 0.309            |
| Sca1            | 24.7             |

**Table S3.** CXCL1-associated genes in primary breast cancers, Related to Figure 3.

| No. | Probe       | Gene symbol | Gene title                                                                                         | MeanCXCL1 Correlation | Protein type  |
|-----|-------------|-------------|----------------------------------------------------------------------------------------------------|-----------------------|---------------|
| 1   | 204470_at   | CXCL1       | chemokine (C-X-C motif) ligand 1 (melanoma growth stimulating activity, alpha)                     | 1                     | Chemokine     |
| 2   | 209774_x_at | CXCL2       | chemokine (C-X-C motif) ligand 2                                                                   | 0.58420139            | Chemokine     |
| 3   | 205476_at   | CCL20       | chemokine (C-C motif) ligand 20                                                                    | 0.507142691           | Chemokine     |
| 4   | 214974_x_at | CXCL5       | chemokine (C-X-C motif) ligand 5                                                                   | 0.503264274           | Chemokine     |
| 5   | 207850_at   | CXCL3       | chemokine (C-X-C motif) ligand 3                                                                   | 0.442087948           | Chemokine     |
| 6   | 202917_s_at | S100A8      | S100 calcium binding protein A8                                                                    | 0.436591522           | Chemokine     |
| 7   | 219454_at   | EGFL6       | EGF-like-domain, multiple 6                                                                        | 0.430470932           | Growth factor |
| 8   | 203535_at   | S100A9      | S100 calcium binding protein A9                                                                    | 0.421452025           | Chemokine     |
| 9   | 214370_at   | S100A8      | S100 calcium binding protein A8                                                                    | 0.416780713           | Chemokine     |
| 10  | 201984_s_at | EGFR        | epidermal growth factor receptor (erythroblastic leukemia viral (v-erb-b) oncogene homolog, avian) | 0.414932963           | Receptor      |
| 11  | 216598_s_at | CCL2        | chemokine (C-C motif) ligand 2                                                                     | 0.406927087           | Chemokine     |
| 12  | 32128_at    | CCL18       | chemokine (C-C motif) ligand 18 (pulmonary and activation-regulated)                               | 0.404640555           | Chemokine     |
| 13  | 206336_at   | CXCL6       | chemokine (C-X-C motif) ligand 6 (granulocyte chemotactic protein 2)                               | 0.398592045           | Chemokine     |
| 14  | 209924_at   | CCL18       | chemokine (C-C                                                                                     | 0.397682961           | Chemokine     |

|    |             |        |                                                                                                                       |             |                           |
|----|-------------|--------|-----------------------------------------------------------------------------------------------------------------------|-------------|---------------------------|
|    |             |        | motif) ligand 18<br>(pulmonary and<br>activation-<br>regulated)                                                       |             |                           |
| 15 | 204259_at   | MMP7   | matrix<br>metallopeptidase<br>7 (matrilysin,<br>uterine)                                                              | 0.392437116 | Enzyme                    |
| 16 | 204475_at   | MMP1   | matrix<br>metallopeptidase<br>1 (interstitial<br>collagenase)                                                         | 0.387440495 | Enzyme                    |
| 17 | 211506_s_at | IL8    | interleukin 8                                                                                                         | 0.379937059 | Chemokine                 |
| 18 | 201983_s_at | EGFR   | epidermal<br>growth factor<br>receptor<br>(erythroblastic<br>leukemia viral (v-<br>erb-b) oncogene<br>homolog, avian) | 0.376102229 | Growth factor<br>receptor |
| 19 | 39402_at    | IL1B   | interleukin 1,<br>beta                                                                                                | 0.3687253   | Cytokine                  |
| 20 | 205207_at   | IL6    | interleukin 6<br>(interferon, beta<br>2)                                                                              | 0.367706402 | Cytokine                  |
| 21 | 209395_at   | CHI3L1 | chitinase 3-like 1<br>(cartilage<br>glycoprotein-39)                                                                  | 0.363640348 | Glycoprotein              |
| 22 | 213060_s_at | CHI3L2 | chitinase 3-like 2                                                                                                    | 0.361544619 | Glycoprotein              |
| 23 | 204304_s_at | PROM1  | prominin 1                                                                                                            | 0.356858262 | Glycoprotein              |
| 24 | 206407_s_at | CCL13  | chemokine (C-C<br>motif) ligand 13                                                                                    | 0.352624539 | Chemokine                 |
| 25 | 204655_at   | CCL5   | chemokine (C-C<br>motif) ligand 5                                                                                     | 0.349987181 | Chemokine                 |
| 26 | 209396_s_at | CHI3L1 | chitinase 3-like 1<br>(cartilage<br>glycoprotein-39)                                                                  | 0.348925927 | Glycoprotein              |
| 27 | 205992_s_at | IL15   | interleukin 15                                                                                                        | 0.343998585 | Cytokine                  |
| 28 | 204533_at   | CXCL10 | chemokine (C-X-<br>C motif) ligand<br>10                                                                              | 0.342768882 | Cytokine                  |
| 29 | 218995_s_at | EDN1   | endothelin 1                                                                                                          | 0.336944246 | Peptide                   |
| 30 | 201859_at   | SRGN   | serglycin                                                                                                             | 0.336477656 | Proteoglycan              |
| 31 | 205067_at   | IL1B   | interleukin 1,<br>beta                                                                                                | 0.332933317 | cytokine                  |
| 32 | 203828_s_at | IL32   | interleukin 32                                                                                                        | 0.331005112 | Cytokine                  |
| 33 | 1405_i_at   | CCL5   | chemokine (C-C                                                                                                        | 0.330034012 | Chemokine                 |

|    |             |               |                                                   |             |                                   |
|----|-------------|---------------|---------------------------------------------------|-------------|-----------------------------------|
|    |             |               | motif) ligand 5                                   |             |                                   |
| 34 | 202912_at   | ADM           | adrenomedullin                                    | 0.322009119 | Preprohormone                     |
| 35 | 213975_s_at | LYZ           | lysozyme (renal amyloidosis)                      | 0.32161241  | Enzyme                            |
| 36 | 207113_s_at | TNF           | tumor necrosis factor (TNF superfamily, member 2) | 0.318836447 | Cytokine                          |
| 37 | 207339_s_at | LTB           | lymphotoxin beta (TNF superfamily, member 3)      | 0.313814703 | Cytokine                          |
| 38 | 823_at      | CX3CL1        | chemokine (C-X3-C motif) ligand 1                 | 0.311766873 | Chemokine                         |
| 39 | 205290_s_at | BMP2          | bone morphogenetic protein 2                      | 0.309658146 | Cytokine                          |
| 40 | 214456_x_at | SAA1 /// SAA2 | serum amyloid A1 /// serum amyloid A2             | 0.307759706 | Apolipoprotein                    |
| 41 | 202510_s_at | TNFAIP2       | tumor necrosis factor, alpha-induced protein 2    | 0.307469211 | TNF induced primary response gene |
| 42 | 208607_s_at | SAA1 /// SAA2 | serum amyloid A1 /// serum amyloid A2             | 0.306284948 | Apolipoprotein                    |
| 43 | 201858_s_at | SRGN          | serglycin                                         | 0.304778725 | Proteoglycan                      |
| 44 | 214038_at   | CCL8          | chemokine (C-C motif) ligand 8                    | 0.301369728 | Chemokine                         |

**Table S4.** CXCL1-Associated Genes in Breast Cancer Metastases, Related to Figure 3

| No. | Probe       | Gene Symbol   | Gene Title                                                                     | MeanCXCL1 Correlation | Protein Type                  |
|-----|-------------|---------------|--------------------------------------------------------------------------------|-----------------------|-------------------------------|
| 1   | 204470_at   | CXCL1         | chemokine (C-X-C motif) ligand 1 (melanoma growth stimulating activity, alpha) | 1                     | Chemokine                     |
| 2   | 207850_at   | CXCL3         | chemokine (C-X-C motif) ligand 3                                               | 0.727384488           | Chemokine                     |
| 3   | 214974_x_at | CXCL5         | chemokine (C-X-C motif) ligand 5                                               | 0.72156911            | Chemokine                     |
| 4   | 214456_x_at | SAA1 /// SAA2 | serum amyloid A1 /// serum amyloid A2                                          | 0.692151247           | Apolipoprotein                |
| 5   | 208607_s_at | SAA1 /// SAA2 | serum amyloid A1 /// serum amyloid A2                                          | 0.62306514            | Apolipoprotein                |
| 6   | 202859_x_at | IL8           | interleukin 8                                                                  | 0.618285539           | Chemokine                     |
| 7   | 204304_s_at | PROM1         | prominin 1                                                                     | 0.574115805           | Glycoprotein                  |
| 8   | 206336_at   | CXCL6         | chemokine (C-X-C motif) ligand 6 (granulocyte chemotactic protein 2)           | 0.518174074           | Chemokine                     |
| 9   | 215101_s_at | CXCL5         | chemokine (C-X-C motif) ligand 5                                               | 0.501422376           | Chemokine                     |
| 10  | 204259_at   | MMP7          | matrix metalloproteinase 7 (matrilysin, uterine)                               | 0.479886003           | Enzyme                        |
| 11  | 209774_x_at | CXCL2         | chemokine (C-X-C motif) ligand 2                                               | 0.46608999            | Chemokine                     |
| 12  | 203535_at   | S100A9        | S100 calcium binding protein A9                                                | 0.460754596           | Chemokine                     |
| 13  | 211506_s_at | IL8           | interleukin 8                                                                  | 0.446340158           | Chemokine                     |
| 14  | 203687_at   | CX3CL1        | chemokine (C-X3-C motif) ligand 1                                              | 0.440105848           | Chemokine                     |
| 15  | 823_at      | CX3CL1        | chemokine (C-X3-C motif) ligand 1                                              | 0.439724863           | Chemokine                     |
| 16  | 209924_at   | CCL18         | chemokine (C-C motif) ligand 18 (pulmonary and activation-regulated)           | 0.437635648           | Chemokine                     |
| 17  | 33322_i_at  | SFN           | stratifin                                                                      | 0.436301249           | DNA damage response protein   |
| 18  | 206407_s_at | CCL13         | chemokine (C-C motif) ligand 13                                                | 0.433070003           | Chemokine                     |
| 19  | 202917_s_at | S100A8        | S100 calcium binding protein A8                                                | 0.432105649           | Chemokine                     |
| 20  | 209260_at   | SFN           | stratifin                                                                      | 0.423454846           | DNA damage response protein   |
| 21  | 205014_at   | FGFBP1        | fibroblast growth factor binding protein 1                                     | 0.411514624           | Glycoprotein                  |
| 22  | 204455_at   | DST           | dystonin                                                                       | 0.407415007           | Cytoskeletal linker protein   |
| 23  | 213936_x_at | SFTPB         | surfactant, pulmonary-associated protein B                                     | 0.406917077           | Surfactant associated protein |
| 24  | 33323_r_at  | SFN           | stratifin                                                                      | 0.406474275           | DNA damage response protein   |
| 25  | 205476_at   | CCL20         | chemokine (C-C motif) ligand 20                                                | 0.396314999           | Chemokine                     |
| 26  | 214354_x_at | SFTPB         | surfactant, pulmonary-associated protein B                                     | 0.393006377           | Surfactant associated protein |
| 27  | 32128_at    | CCL18         | chemokine (C-C motif) ligand 18 (pulmonary and activation-regulated)           | 0.392319189           | Chemokine                     |
| 28  | 1405_i_at   | CCL5          | chemokine (C-C motif) ligand 5                                                 | 0.389002998           | Chemokine                     |
| 29  | 209396_s_at | CHI3L1        | chitinase 3-like 1 (cartilage glycoprotein-39)                                 | 0.381922747           | Glycoprotein                  |
| 30  | 218995_s_at | EDN1          | endothelin 1                                                                   | 0.380452512           | Vasoconstrictor peptide       |

|    |             |        |                                                                 |             |                               |
|----|-------------|--------|-----------------------------------------------------------------|-------------|-------------------------------|
| 31 | 205266_at   | LIF    | leukemia inhibitory factor (cholinergic differentiation factor) | 0.379145451 | Cytokine                      |
| 32 | 201983_s_at | EGFR   | epidermal growth factor receptor                                | 0.377765594 | Receptor                      |
| 33 | 201984_s_at | EGFR   | epidermal growth factor receptor                                | 0.37549647  | Receptor                      |
| 34 | 209395_at   | CHI3L1 | chitinase 3-like 1 (cartilage glycoprotein-39)                  | 0.367313688 | Glycoprotein                  |
| 35 | 202018_s_at | LTF    | lactotransferrin                                                | 0.363344816 | Glycoprotein                  |
| 36 | 209810_at   | SFTPB  | surfactant, pulmonary-associated protein B                      | 0.362288432 | Surfactant associated protein |
| 37 | 204153_s_at | MFNG   | MFNG O-fucosylpeptide 3-beta-N-acetylglucosaminyltransferase    | 0.360062212 | Glycoprotein                  |
| 38 | 204655_at   | CCL5   | chemokine (C-C motif) ligand 5                                  | 0.355893728 | Chemokine                     |
| 39 | 214461_at   | LBP    | lipopolysaccharide binding protein                              | 0.350076877 | Acute phase protein           |
| 40 | 206560_s_at | MIA    | melanoma inhibitory activity                                    | 0.349846506 | Growth factor                 |
| 41 | 37004_at    | SFTPB  | surfactant, pulmonary-associated protein B                      | 0.349391767 | Surfactant associated protein |
| 42 | 203828_s_at | IL32   | interleukin 32                                                  | 0.345291084 | Cytokine                      |
| 43 | 212662_at   | PVR    | poliovirus receptor                                             | 0.339601184 | Ig like family of proteins    |
| 44 | 205654_at   | C4BPA  | complement component 4 binding protein, alpha                   | 0.335596848 | Complement activation protein |
| 45 | 207861_at   | CCL22  | chemokine (C-C motif) ligand 22                                 | 0.332404796 | Chemokine                     |
| 46 | 207816_at   | LALBA  | lactalbumin, alpha-                                             | 0.330824407 | Protein in lactose synthesis  |
| 47 | 205016_at   | TGFA   | transforming growth factor, alpha                               | 0.31799294  | Growth factor                 |
| 48 | 214370_at   | S100A8 | S100 calcium binding protein A8                                 | 0.313752555 | Chemokine                     |
| 49 | 219454_at   | EGFL6  | EGF-like-domain, multiple 6                                     | 0.310355128 | Growth factor                 |
| 50 | 204858_s_at | TYMP   | thymidine phosphorylase                                         | 0.30100493  | Enzyme                        |

**Table S5.** Deidentified Clinical Information of Breast Cancer Patients Treated with Neoadjuvant Chemotherapy, Related to Figure 5

| Case No. | ER Status | PR Status | HER2 Status | Grade | Chemo                 | Pathologic Response to Chemo | Survival Status   |
|----------|-----------|-----------|-------------|-------|-----------------------|------------------------------|-------------------|
| 1001     | Positive  | Positive  | Negative    | 3     | AC-T                  | PR                           | NED               |
| 1002     | Negative  | Negative  | Negative    | 3     | EC-T                  | PR                           | AWD               |
| 1003     | Positive  | Positive  | Negative    | 3     | AC-T                  | MR                           | NED               |
| 1004     | Negative  | Negative  | Negative    | 3     | AC-T                  | CR                           | NED               |
| 1005     | Positive  | Positive  | Negative    | 3     | AC-T                  | MR                           | AWD               |
| 1006     | Negative  | Negative  | Negative    | 3     | AC-T                  | PR                           | NED               |
| 1007     | Negative  | Negative  | Positive    | 3     | AC-TH                 | CR                           | NED               |
| 1008     | Positive  | Positive  | Negative    | 3     | AC-T                  | MR                           | NED               |
| 1009     | Positive  | Positive  | Negative    | 2     | AC-T                  | MR                           | NED               |
| 1010     | Negative  | Negative  | Negative    | 2     | AC-T                  | PR                           | NED               |
| 1011     | Positive  | Positive  | Negative    | 3     | AC-T                  | PR                           | NED               |
| 1012     | Positive  | Positive  | Negative    | 2     | AC-T                  | PR                           | NED               |
| 1013     | Positive  | Positive  | Negative    | 3     | AC-T                  | MR                           | NED               |
| 1014     | Negative  | Negative  | Negative    | 3     | AC-T                  | PR                           | NED               |
| 1015     | Positive  | Negative  | Positive    | 3     | AC-TH                 | MR                           | NED               |
| 1016     | Positive  | Positive  | Negative    | 1     | AC-T                  | MR                           | NED               |
| 1017     | Positive  | Negative  | Negative    | 3     | AC-T                  | PR                           | Died - other      |
| 1018     | Positive  | Positive  | Negative    | 2     | AC-T*                 | PR                           | NED               |
| 1019     | Negative  | Negative  | Positive    | 3     | TH                    | CR                           | NED               |
| 1020     | Negative  | Negative  | Positive    | 3     | AC-TH                 | CR                           | NED               |
| 1021     | Negative  | Negative  | Positive    | 3     | AC-T                  | PR                           | Died - of disease |
| 1022     | Positive  | Positive  | Negative    | 3     | AC-T                  | MR                           | NED               |
| 1023     | Positive  | Negative  | Positive    | 3     | AC-T                  | MR                           | NED               |
| 1024     | Positive  | Positive  | Negative    | 3     | AC-T                  | PR                           | NED               |
| 1025     | Negative  | Neg       | Positive    | 3     | EC-T                  | PR                           | AWD               |
| 1026     | Positive  | Negative  | Negative    | 3     | AC-T                  | CR                           | NED               |
| 1027     | Positive  | Positive  | Positive    | 3     | AC-TH                 | PR                           | NED               |
| 1028     | Positive  | Positive  | Negative    | 3     | AC-T                  | PR                           | NED               |
| 1029     | Positive  | Positive  | Negative    | 3     | AC-T                  | PR                           | NED               |
| 1031     | Negative  | Negative  | Negative    | 3     | Carboplatin, T,B,AC+B | PR                           | NED               |
| 1032     | Positive  | Positive  | Positive    | 3     | AC-TH                 | CR                           | NED               |
| 1033     | Positive  | Positive  | Negative    | 3     | AC-T                  | PR                           | NED               |

|      |          |          |          |             |       |    |     |
|------|----------|----------|----------|-------------|-------|----|-----|
| 1034 | Positive | Positive | Negative | 2           | EC-T  | PR | NED |
| 1035 | Positive | Negative | Negative | 3           | AC-T  | PR | NED |
| 1036 | Positive | Positive | Negative | Unkno<br>wn | EC-T  | PR | NED |
| 1037 | Positive | Positive | Negative | 3           | D+C   | PR | NED |
| 1038 | Positive | Negative | Negative | 3           | T+L   | PR | NED |
| 1039 | Negative | Negative | Negative | 3           | AC-T  | CR | NED |
| 1040 | Positive | Positive | Positive | 3           | AC-TH | CR | NED |
| 1041 | Positive | Positive | Negative | 3           | AC-T  | CR | NED |
